# Supplementary material for: RAFT-mediated polymerisation of dialkylaminoethyl methacrylates in tert-butanol
Source: Royal Society of Chemistry journal article supplement (doi:10.1039/c8py01803k), 2019-01-01
Supplement: c8py01803k1.pdf [file c8py01803k1.pdf]

Electronic Supplementary Information

For

**RAFT-mediated polymerisation of dialkylaminoethyl methacrylates in *tert*-butanol**

J. Arredondo, P. Champagne, M. F. Cunningham

Monomer conversion is calculated as follows. The same calculation applies for all three monomer types.

$$\% \text{ conv} = \left( 1 - \frac{2H_a}{H_{b+c} - 2H_a} \right) * 100$$

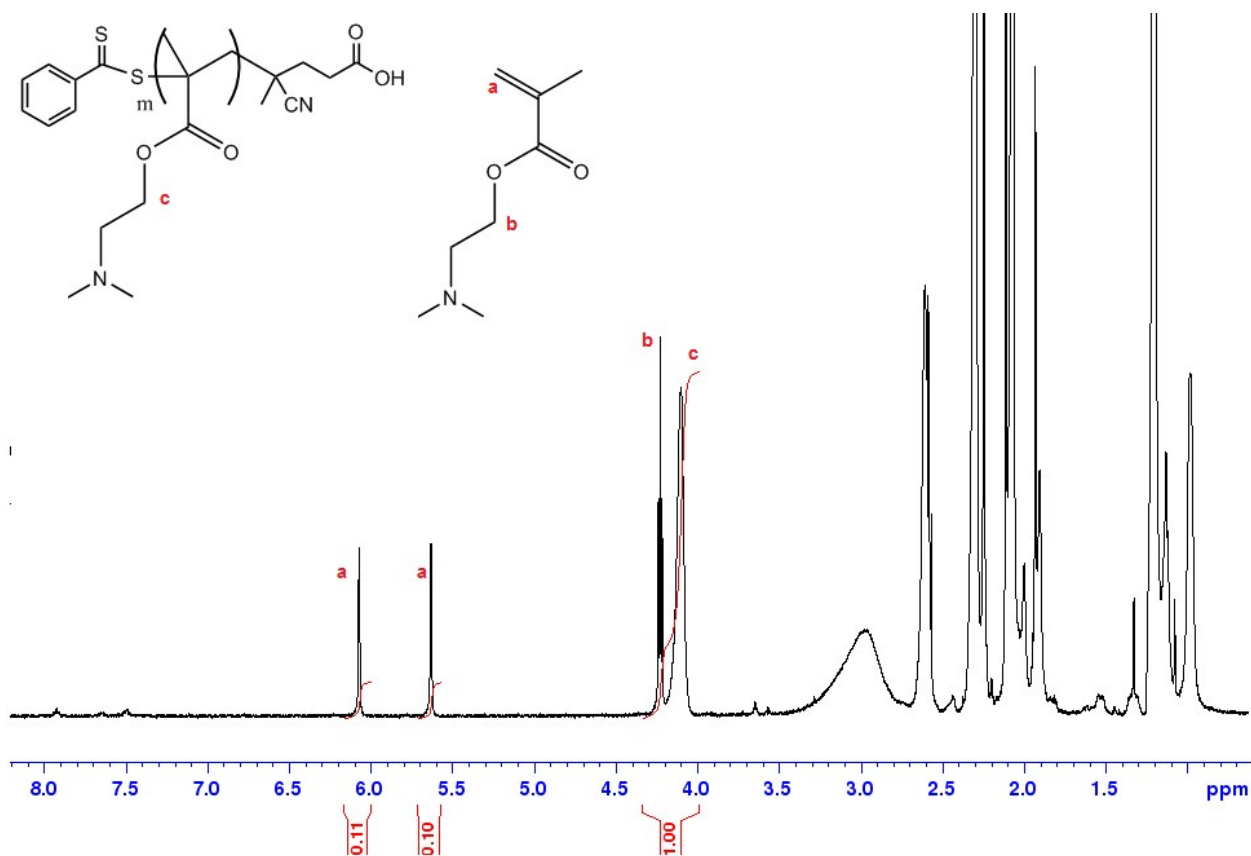

**S1. <sup>1</sup>H NMR spectrum of DMAEMA polymerization in *t*-BuOH.**

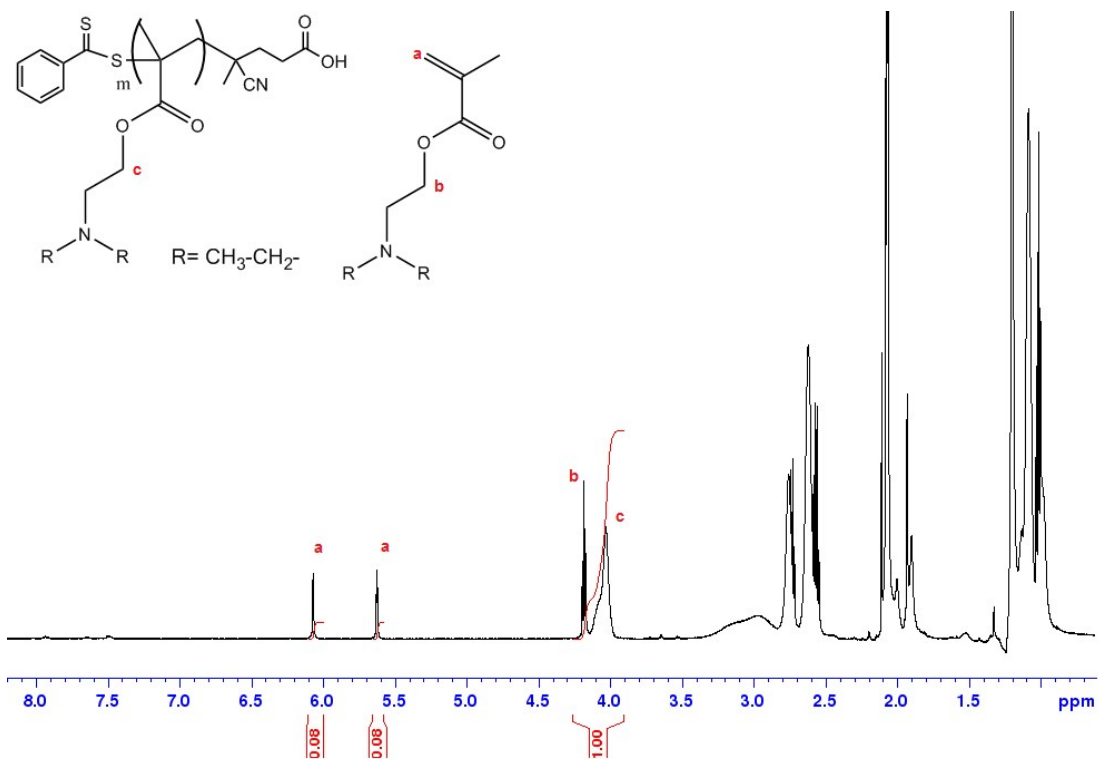

**S2. <sup>1</sup>H NMR spectrum of DEAEMA polymerisation in t-BuOH.**

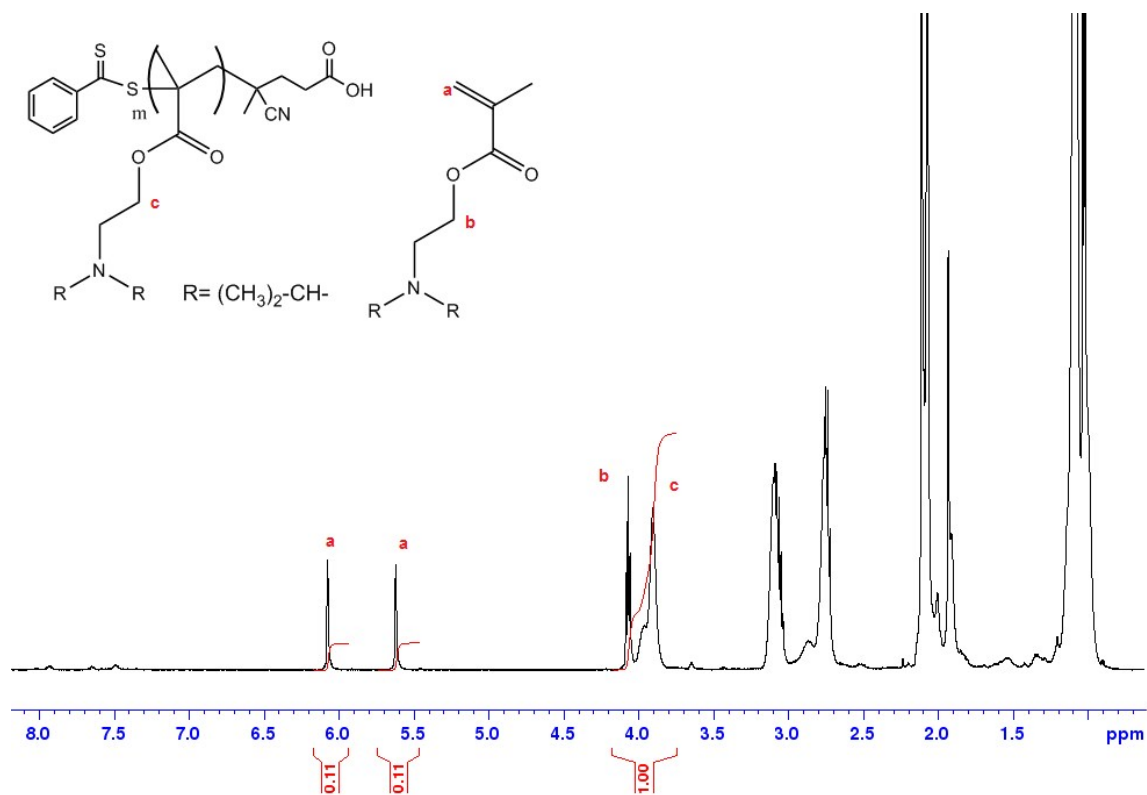

**S3. <sup>1</sup>H NMR spectrum of DPAEMA polymerisation in bulk.**

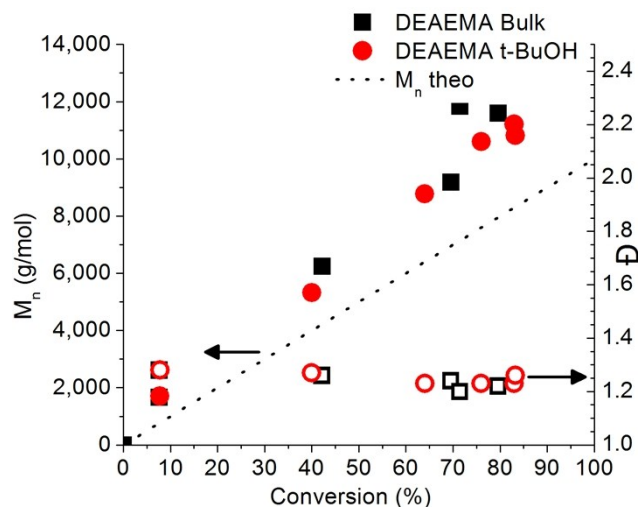

**S4. Evolution of  $M_n$  vs. conversion of PDEAEMA, bulk and in tert-butanol via RAFT polymerisation at 70°C. DMAEMA:  $[M]_0 : [CTP]_0 : [I]_0 = 318:5:1$ .**

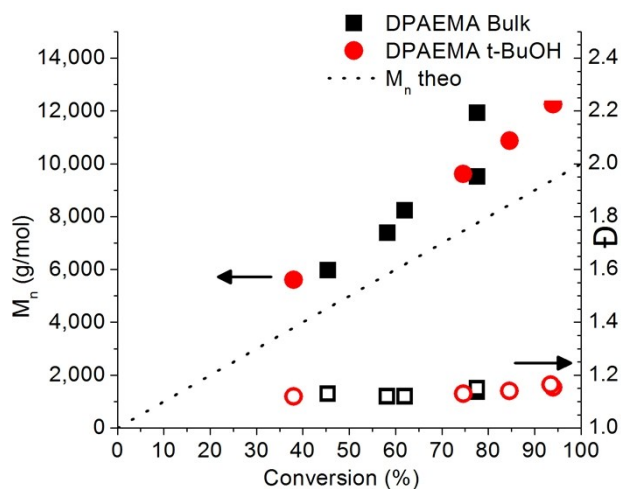

**S5. Evolution of  $M_n$  vs. conversion of PDPAEMA, bulk and in tert-butanol via RAFT polymerisation at 70°C. DMAEMA:  $[M]_0 : [CTP]_0 : [I]_0 = 318:5:1$ .**

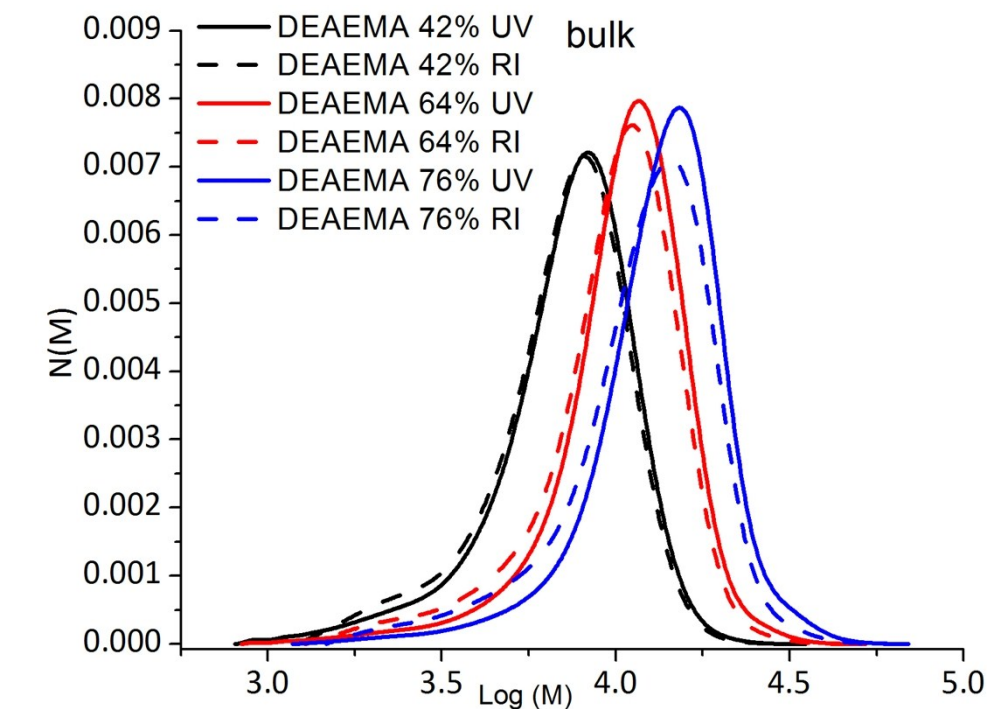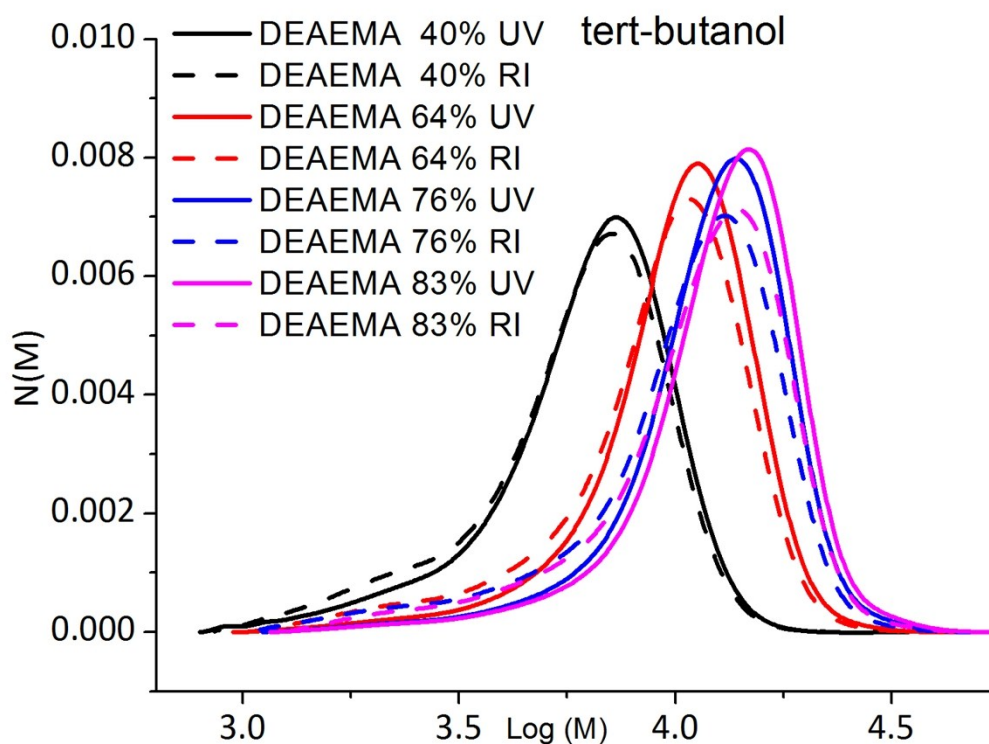

**S6. Number-based MWDs of the polymerisation of DEAEMA in bulk and in tert-butanol via RAFT polymerisation at 70°C.  $[M]_0 : [CTP]_0 : [I]_0 = 318:5:1$ .**

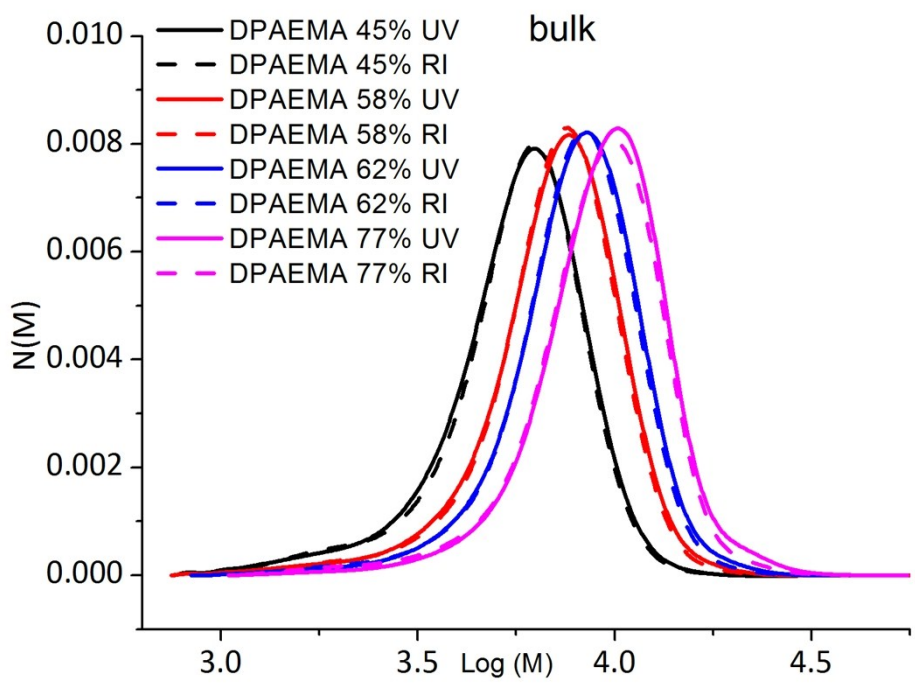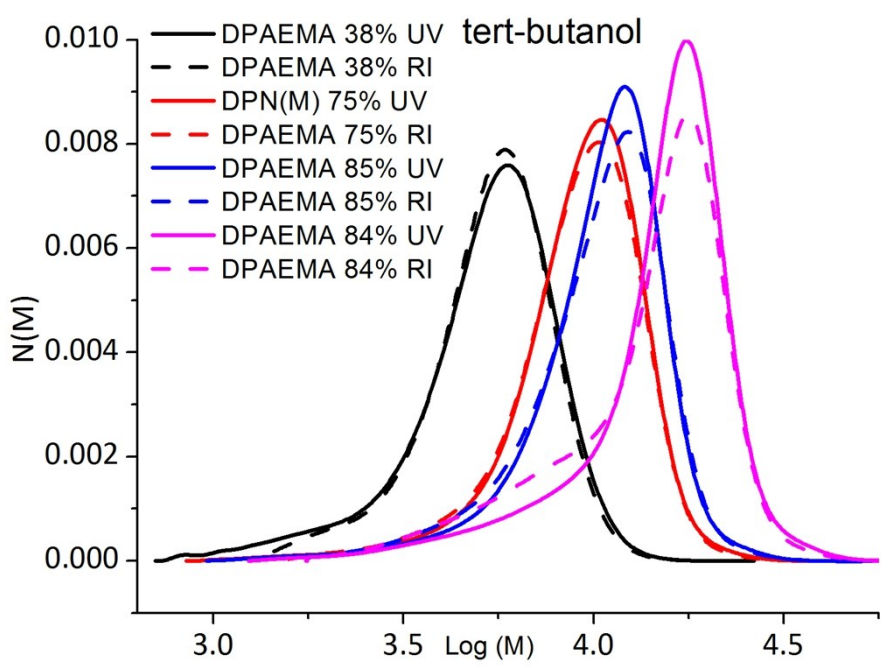

**S7. Number-based MWDs of the polymerisation of DPAEMA in bulk and in tert-butanol via RAFT polymerisation at 70°C.  $[M]_0 : [CTP]_0 : [I]_0 = 318:5:1$ .**

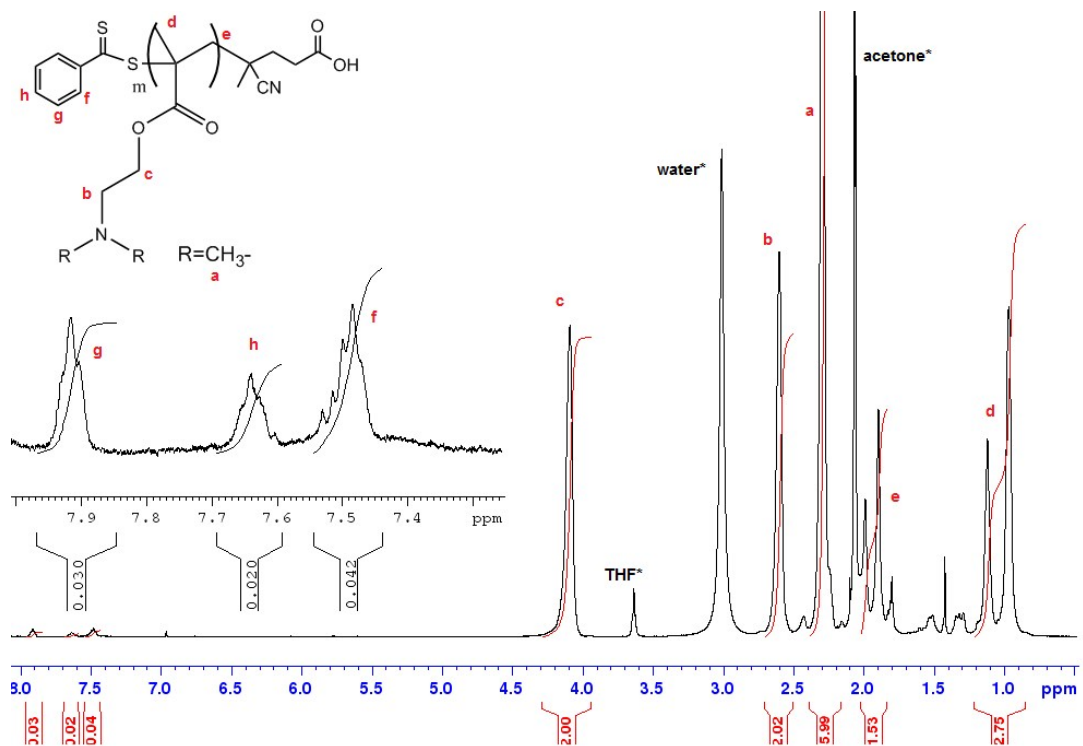

S8.  $^1\text{H}$  NMR spectrum of PDMAEMA based macro-RAFT agent.

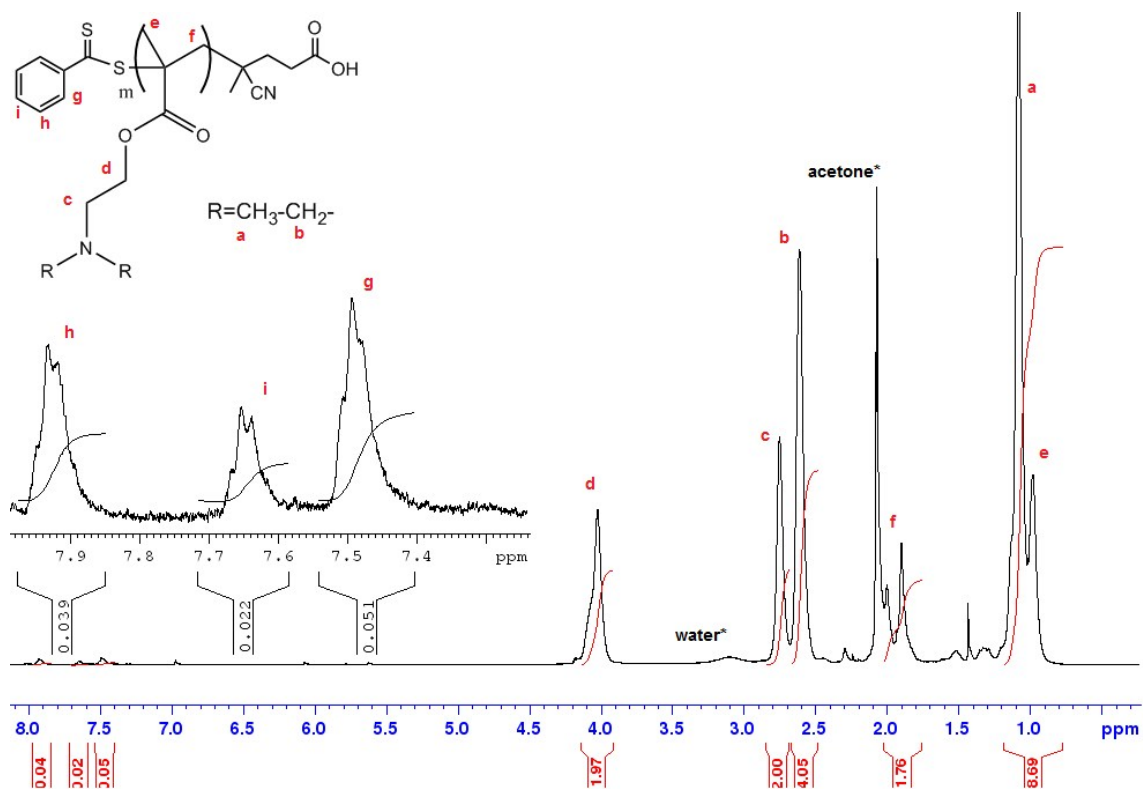

S9.  $^1\text{H}$  NMR spectrum of PDEAEMA based macro-RAFT agent.

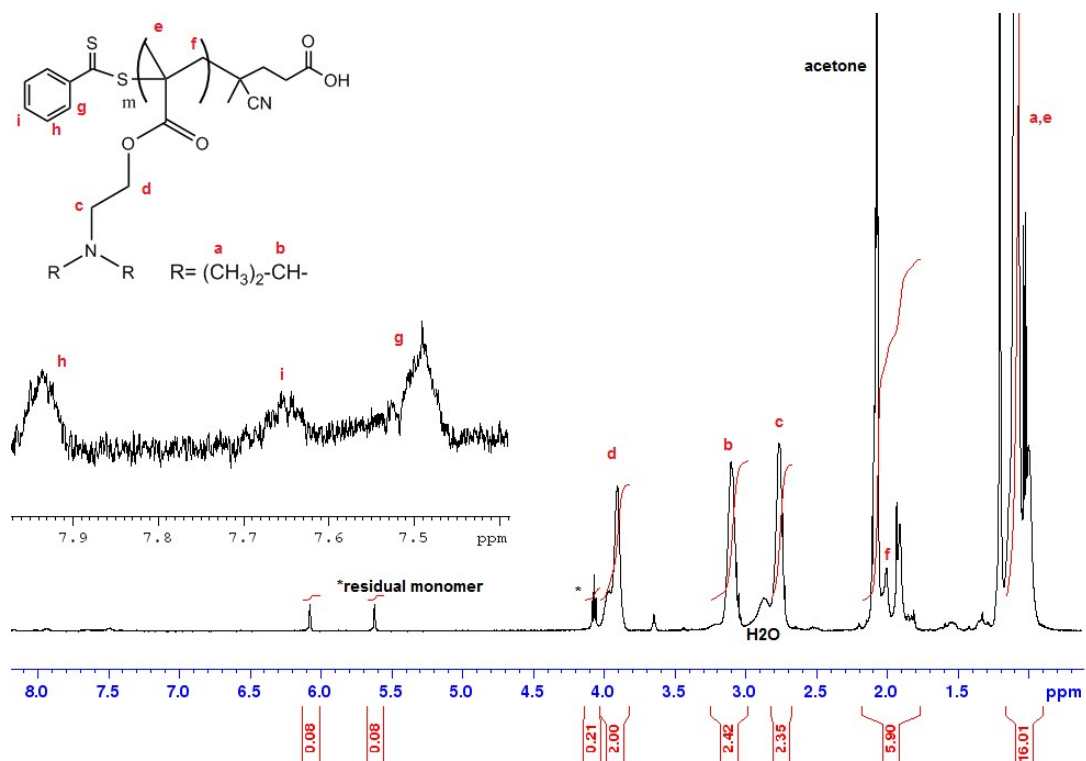

**S10.  $^1\text{H}$  NMR spectrum of PDPAEMA based macro-RAFT agent.**

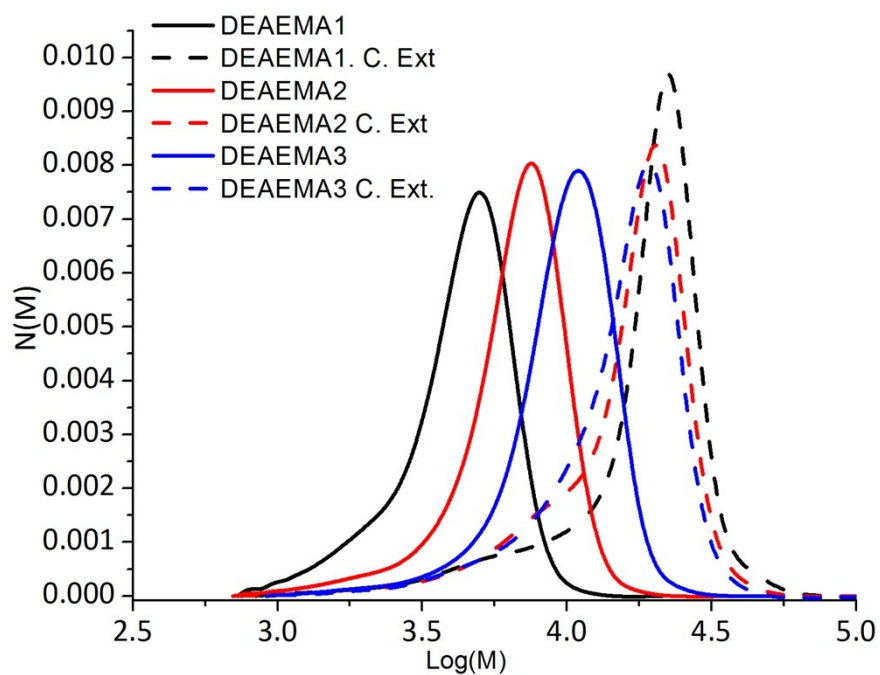

**S11. Number-based MWDs of PDEAEMA macro-RAFT agents before and after chain-extension.  $[\text{macro-RAFT}]:[\text{ACVA}] = 5$ , in tert-butanol at  $70^\circ\text{C}$ .**

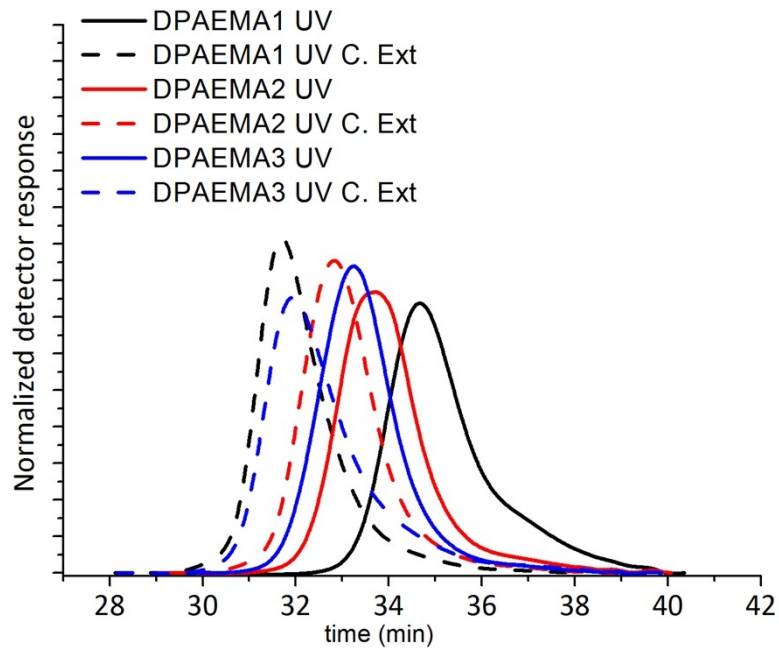

**S12. GPC-UV traces of PDPAEMA macro-RAFT agents before and after chain-extension. [macro-RAFT]:[ACVA] = 5, in tert-butanol at 70°C.**



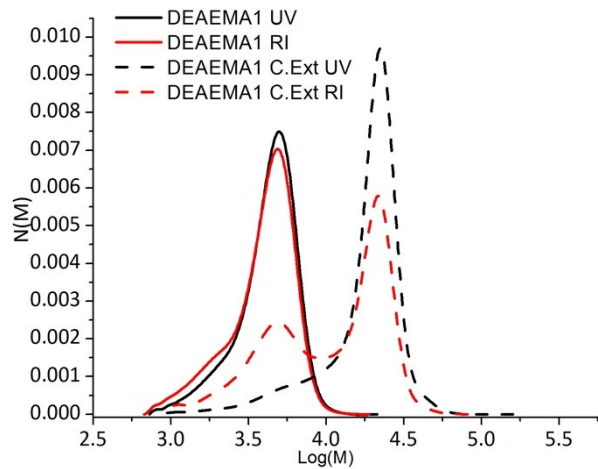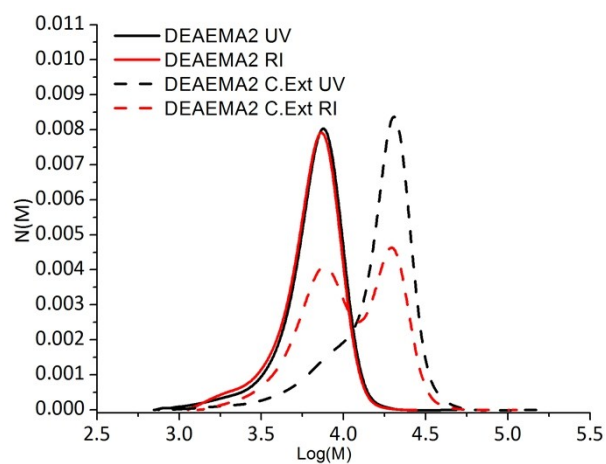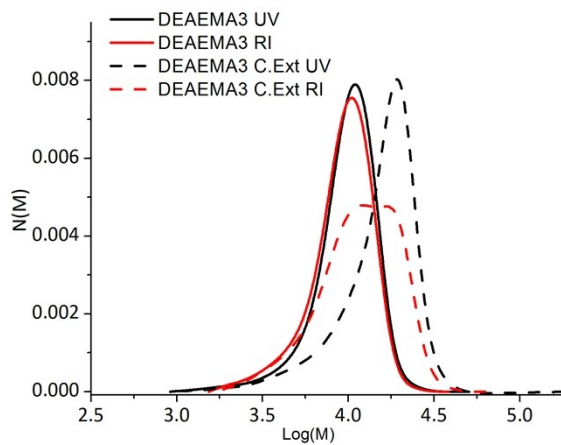

**S13. Number-based MWDs of DE1, DE2, DE3 macro-RAFT agents before and after chain-extension. [macro-RAFT]:[ACVA] = 5, in tert-butanol at 70°C after 16h.**

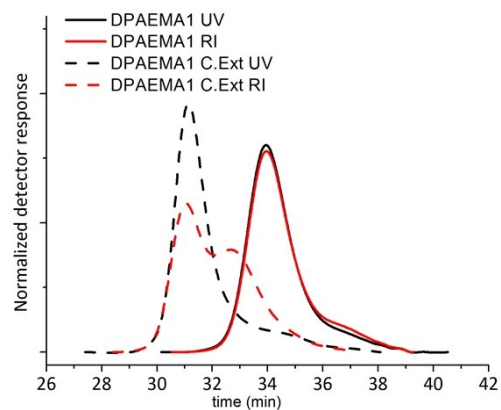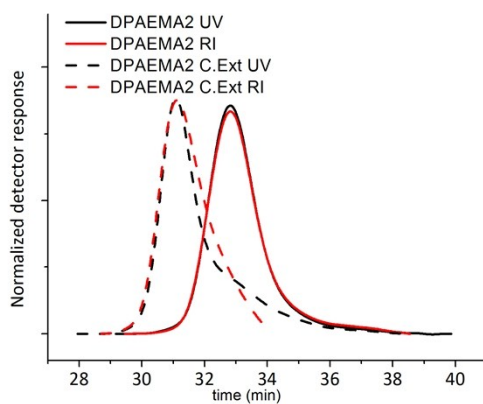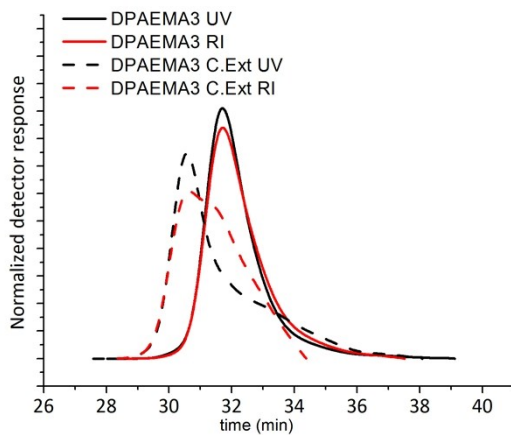

**S14. GPC-UV-RI traces of DP1, DP2 and DP3 macro-RAFT agents before and after chain-extension. [macro-RAFT]:[ACVA] = 5, in tert-butanol at 70°C after 16h.**

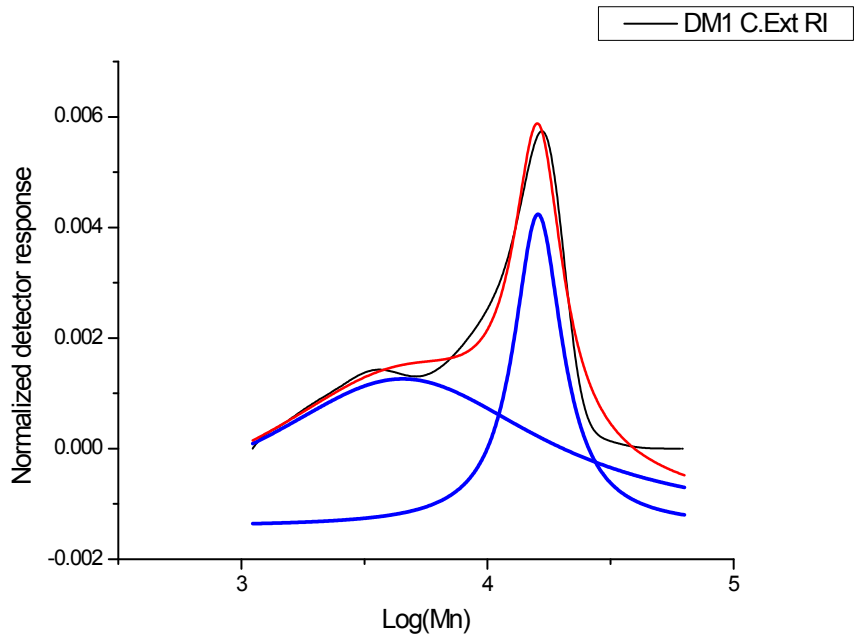

**S15. Multi-peak fitting of the RI chain-extension trace of DM1.**

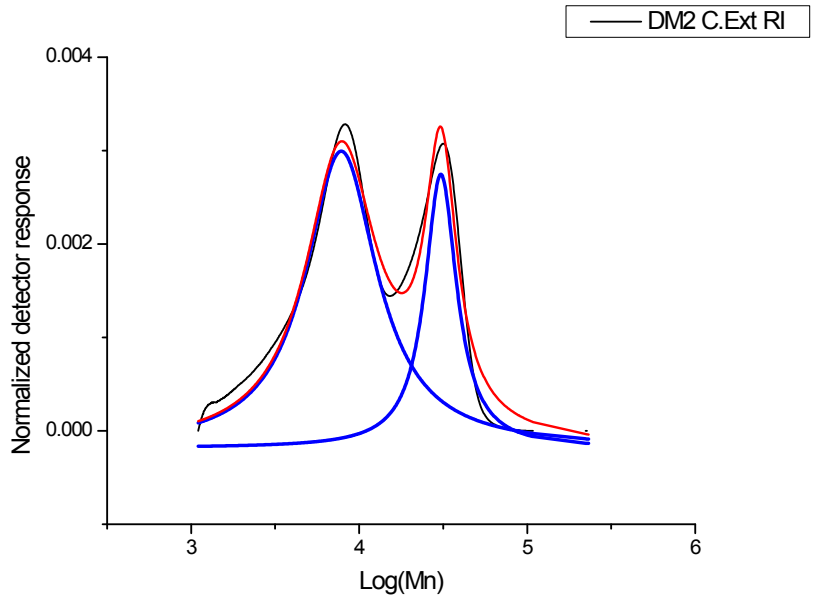

**S16. Multi-peak fitting of the RI chain-extension trace of DM2.**

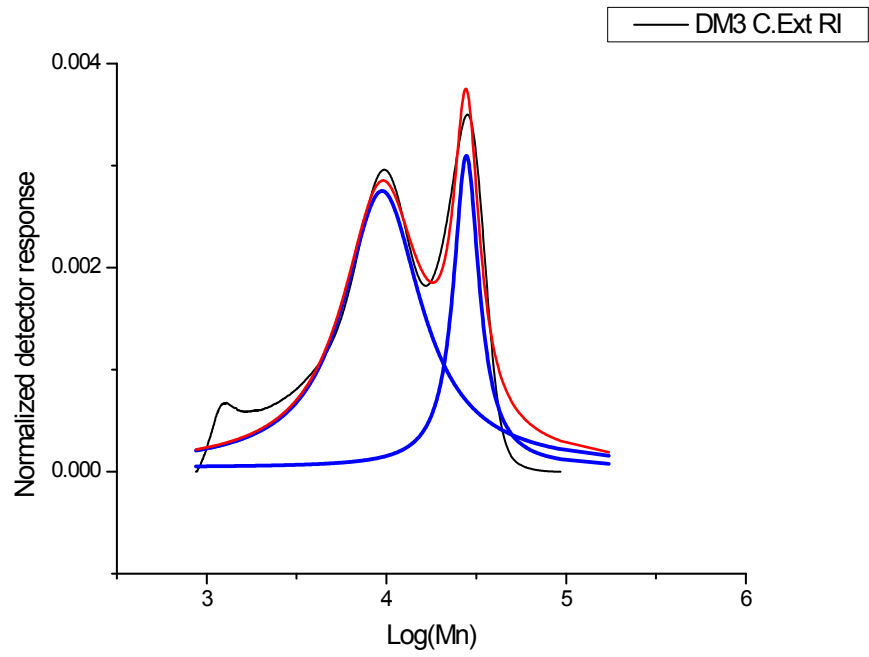

**S17. Multi-peak fitting of the RI chain-extension trace of DM3.**
